# Supplementary material for: Comparative Effectiveness of Non-Carbapenem versus Carbapenem Therapy for Serious Infections Caused by AmpC β-Lactamase-Producing Enterobacteriaceae: A Retrospective Cohort Study
Source: Research Square preprint supplement (doi:10.21203/rs.3.rs-7855477/v1), 2025-10-31
Supplement: Supplementary file 1 [file 78843312e83acc5fee0ce6ee.docx]

**Table 1. Baseline Characteristics of Study Population**

| **Characteristic** | **Carbapenem (n=68)** | **Non-Carbapenem (n=57)** | **P-value** |
| --- | --- | --- | --- |
| **Demographics** |  |  |  |
| Age, years (mean ± SD) | 61.3 ± 16.2 | 65.4 ± 14.8 | 0.158a |
| Age ≥65 years, n (%) | 32 (47.1) | 32 (56.1) | 0.320b |
| Male gender, n (%) | 41 (60.3) | 28 (49.1) | 0.227b |
| **Comorbidities, n (%)** |  |  |  |
| Diabetes mellitus | 42 (61.8) | 33 (57.9) | 0.674b |
| Hypertension | 44 (64.7) | 34 (59.6) | 0.567b |
| Chronic kidney disease | 24 (35.3) | 19 (33.3) | 0.821b |
| Cardiac disease | 35 (51.5) | 26 (45.6) | 0.520b |
| Cancer | 16 (23.5) | 10 (17.5) | 0.419b |
| COPD | 3 (4.4) | 2 (3.5) | 0.999c |
| Liver disease | 3 (4.4) | 2 (3.5) | 0.999c |
| Comorbidity burden ≥3, n (%) | 53 (77.9) | 38 (66.7) | 0.166b |
| **Infection characteristics** |  |  |  |
| Source of infection |  |  | 0.634b |
| Urinary tract | 28 (41.2) | 26 (45.6) |  |
| Respiratory tract | 15 (22.1) | 10 (17.5) |  |
| Bloodstream | 12 (17.6) | 12 (21.1) |  |
| Intra-abdominal | 8 (11.8) | 6 (10.5) |  |
| Other | 5 (7.4) | 3 (5.3) |  |
| **Severity markers** |  |  |  |
| ICU admission, n (%) | 21 (30.9) | 11 (19.3) | 0.491b |
| APACHE IV score  (median, IQR) | 45 (32-61) | 42 (35-58) | 0.743a |

**Abbreviations:** SD, standard deviation; COPD, chronic obstructive pulmonary disease; ICU, intensive care unit; IQR, interquartile range.
a Student's t-test; b Chi-square test; c Fisher's exact test.

**Table 2. Comprehensive Mortality Analysis**

| **Mortality Endpoint** | **Carbapenem (n=68)** | **Non-Carbapenem (n=57)** | **Risk Difference (95% CI)** | **OR (95% CI)** | **P-value** |
| --- | --- | --- | --- | --- | --- |
| **30-day mortality** | 10 (14.7) | 7 (12.3) | -2.4% (-12.8 to 8.0) | 0.81 (0.30-2.20) | 0.708a |
| **90-day mortality** | 13 (19.1) | 8 (14.0) | -5.1% (-16.8 to 6.6) | 0.69 (0.28-1.69) | 0.429a |

Data presented as n (%) unless otherwise specified.
**Abbreviations:** OR, odds ratio; CI, confidence interval.
a Fisher's exact test; b Chi-square test.

**Table 3. Secondary Outcomes**

| **Outcome** | **Carbapenem (n=68)** | **Non-Carbapenem (n=57)** | **OR**  **(95% CI)** | **P-value** |
| --- | --- | --- | --- | --- |
| Clinical cure | 44 (64.7) | 41 (71.9) | 1.40 (0.70-2.80) | 0.350b |
| ICU mortality | 11 out of 21 ICU patients (52.4) | 5 out of 11 ICU patients (45.5) | 0.76 (0.18-3.27) | 0.710a |
| Recurrence of infection | 9 (13.2) | 6 (10.5) | 0.77 (0.27-2.19) | 0.633a |
| Length of stay, days (mean ± SD) | 14.2 ± 8.6 | 12.8 ± 7.4 | — | 0.346c |
| Treatment escalation | 20 (29.4) | 14 (24.6) | 0.78 (0.36-1.69) | 0.550b |

Data presented as n (%) unless otherwise specified.
**Abbreviations:** OR, odds ratio; CI, confidence interval; ICU, intensive care unit; SD, standard deviation.
a Fisher's exact test; b Chi-square test; c Mann-Whitney U test.

**Table 4. Pathogen-Specific 30-Day Mortality**

| **Pathogen** | **Total (n)** | **Carbapenem** | **Non-Carbapenem** | **P-value** |
| --- | --- | --- | --- | --- |
| Enterobacter cloacae complex | 61 | 3/31 (9.7%) | 2/30 (6.7%) | 0.999a |
| Klebsiella aerogenes | 28 | 3/16 (18.8%) | 2/12 (16.7%) | 0.999a |
| Citrobacter freundii | 19 | 2/11 (18.2%) | 1/8 (12.5%) | 0.999a |
| Serratia marcescens | 17 | 2/10 (20.0%) | 2/7 (28.6%) | 0.999a |

a Fisher's exact test. No significant differences in pathogen-specific mortality were observed between treatment groups.

**Table 5. Multivariable Logistic Regression Analysis for 30-Day Mortality**

| **Variable** | **Adjusted OR (95% CI)** | **P-value** |
| --- | --- | --- |
| **Treatment group** |  |  |
| Non-carbapenem vs Carbapenem | 0.73 (0.24-2.21) | 0.578 |
| Age ≥65 years | 2.84 (0.89-9.06) | 0.077 |
| Comorbidity burden ≥3 | 2.97 (0.62-14.26) | 0.175 |
| ICU admission | 1.89 (0.58-6.15) | 0.295 |
| Empiric therapy | 1.24 (0.39-3.93) | 0.714 |
| **Pathogen type** |  |  |
| K. aerogenes vs E. cloacae | 2.45 (0.53-11.35) | 0.249 |
| Other vs E. cloacae | 1.67 (0.44-6.36) | 0.456 |

**Abbreviations:** OR, odds ratio; CI, confidence interval; ICU, intensive care unit.
Model χ² = 8.94, p = 0.257; Hosmer-Lemeshow goodness-of-fit test p = 0.623.
