# Supplementary material for: Comparative Effectiveness of Non-Carbapenem versus Carbapenem Therapy for Serious Infections Caused by AmpC β-Lactamase-Producing Enterobacteriaceae: A Retrospective Cohort Study
Source: Research Square preprint supplement (doi:10.21203/rs.3.rs-7855477/v1), 2025-10-31
Supplement: Supplementary file 2 [file 96e2403a42f6dd459646a5f7.docx]

**More explanation of the figures in the manuscript**

**Figure 1 explanation**

Flow diagram showing the systematic selection of patients with severe infections caused by AmpC β-lactamase-producing *Enterobacteriaceae* from January 2019 to May 2024 at King Faisal Specialist Hospital & Research Centre, Jeddah. Of 1064 patients initially screened, 939 were excluded. The final cohort (n=125) was divided into carbapenem group (n=68, 54.4%) and non-carbapenem group (n=57, 45.6%). In the carbapenem group, meropenem was the most frequently used agent (85.3%), while cefepime was the most common non-carbapenem agent (66.7%). Some patients in the non-carbapenem group received combination therapy with multiple agents.

**Figure 2 explanation**

Comparison of 30-day and 90-day mortality rates between carbapenem and non-carbapenem therapy groups. Data shows consistently lower mortality rates in the non-carbapenem group at both time points, though differences were not statistically significant (30-day: p=0.708; 90-day: p=0.429).

**Figure 3 explanation**

Odds ratios (squares) with 95% confidence intervals (horizontal lines) for mortality endpoints comparing non-carbapenem to carbapenem therapy. The vertical dashed line represents no treatment effect (OR = 1.0). Values to the left of the line favor non-carbapenem therapy. Event numbers show non-carbapenem versus carbapenem group events.

**Figure 4 explanation**

Bar chart showing 30-day mortality rates stratified by comorbidity burden (≤2 vs ≥3 comorbidities) and treatment group. Among patients with low comorbidity burden (n=45), the non-carbapenem group showed lower mortality (6.7% vs 13.3%, p = 0.593). For patients with high comorbidity burden, mortality rates were similar between groups (18.5% vs 15.1%, p = 0.744). The interaction between comorbidity burden and treatment group was not statistically significant (p = 0.856).

**Rationale for Endpoint Selection**

The selection of a 30-day all-cause mortality as the primary endpoint was predicated on multiple considerations. Firstly, mortality is the most clinically significant and unequivocal outcome for patients with severe infections, directly indicating the effectiveness of treatment in preventing the most adverse events. Secondly, all-cause mortality circumvents the attribution bias associated with infection-specific mortality assessments and has been endorsed as the gold-standard endpoint in antimicrobial comparative effectiveness research. Thirdly, the 30-day interval provides a suitable duration for follow-up to encompass infection-related deaths while reducing confounding mortality risks attributable to underlying comorbidities. This timeframe corresponds with established standards in infectious disease clinical trials and regulatory guidelines [1,2].

Secondary endpoints were selected to provide a comprehensive assessment of treatment effectiveness across multiple clinically relevant domains. Clinical cure and microbiological eradication assess treatment efficacy from clinical and microbiological perspectives, respectively. The 90-day mortality extends the primary endpoint assessment to capture delayed treatment effects or infection-related complications. Length of stay, treatment escalation, infection recurrence, and adverse drug reactions represent pragmatic outcomes important for antimicrobial stewardship decisions and patient-centered care [3,4].

**References**

1. McLeod C, Norman R, Litton E, Saville BR, Webb S, Snelling TL. Choosing primary endpoints for clinical trials of health care interventions. *Contemp Clin Trials Commun*. 2019;16:100486.
2. Colin B. Begg, Justifying the Choice of Endpoints for Clinical Trials, *JNCI: Journal of the National Cancer Institute*. 2013;105(21):1594–1595.
3. Miller AC, Arakkal AT, Sewell DK, et al. Comparison of Different Antibiotics and the Risk for Community-Associated *Clostridioides difficile* Infection: A Case-Control Study. *Open Forum Infect Dis*. 2023;10(8):ofad413.
4. FDA. Multiple Endpoints in Clinical Trials. Biostatistics. 2022. Accessed from <https://www.fda.gov/media/162416/download>

**Rationale for Treatment Group Classification**

The classification of antibiotics into carbapenem and non-carbapenem groups, rather than comparing individual agents, was based on several methodological and clinical considerations. First, this grouping approach addresses the primary research question of carbapenem-sparing antimicrobial stewardship: whether alternative agents as a therapeutic class can replace carbapenems for AmpC-producing infections. Comparing individual agents would require substantially larger sample sizes to achieve adequate statistical power and would not directly address the overarching stewardship question [1,2]. Secondly, this grouping strategy is used in comparative effectiveness research on antimicrobial resistance, where comparisons among treatment classes provide generalizable evidence for real-world prescribing decisions, especially when multiple agents within a class are available. Several landmark studies addressing analogous research questions have utilized comparable grouping methodologies [1-3].

Third, the antibiotics grouped within each category share relevant pharmacological characteristics. All carbapenems (meropenem, imipenem, ertapenem) demonstrate stability against AmpC β-lactamases and comparable spectra of activity against AmpC-producing *Enterobacteriaceae*. Similarly, the non-carbapenem agents included (cefepime, piperacillin-tazobactam, fluoroquinolones, trimethoprim-sulfamethoxazole) represent established alternatives with documented activity against AmpC-producing organisms based on in vitro susceptibility and clinical evidence [1]. Fourth, all included isolates demonstrated in vitro susceptibility to the administered agents per CLSI breakpoints, ensuring therapeutic appropriateness regardless of the specific agent selected within each group. This susceptibility-based selection minimizes bias from inherent resistance differences across agents. Finally, subgroup analyses by specific non-carbapenem agents (cefepime, piperacillin-tazobactam, fluoroquinolones) were performed to explore potential heterogeneity in treatment effects within the non-carbapenem group, addressing concerns about the validity of the composite classification [2].

**References**

1. Miller AC, Arakkal AT, Sewell DK, et al. Comparison of Different Antibiotics and the Risk for Community-Associated *Clostridioides difficile* Infection: A Case-Control Study. *Open Forum Infect Dis*. 2023;10(8):ofad413.
2. Sheibani M, Sadeghifar A, Shafa S, et al. Comparative effectiveness of prophylactic antibiotic regimens in preventing infection in open fractures: a prospective cohort study. *BMC Musculoskelet Disord*. 2025;26(1):809.
3. D.C. Angst, B. Tepekule, L. Sun, B. Bogos, & S. Bonhoeffer, Comparing treatment strategies to reduce antibiotic resistance in an in vitro epidemiological setting, Proc. *Natl. Acad. Sci. U.S.A.* 2021;118 (13) e2023467118.

**Data Quality and Management**

Data were stored securely in REDCap with restricted access limited to study investigators. Patient confidentiality was maintained through the use of unique study identifiers linked to medical record numbers. All data collection and storage followed KFSH&RC policies.

Regular data quality checks included:

- Duplicate record identification and resolution
- Independent review of 10% of cases for data accuracy
